# Supplementary material for: Design and construction of a box-shaped 3D-DNA origami
Source: Royal Society of Chemistry journal article supplement (doi:10.1039/b907800b), 2009-01-01
Supplement: b907800b.pdf [file b907800b.pdf]

Electronic Supplementary Information for  
**"Design and Construction of a Box-Shaped 3D-DNA Origami"**  
Akinori Kuzuya and Makoto Komiyama

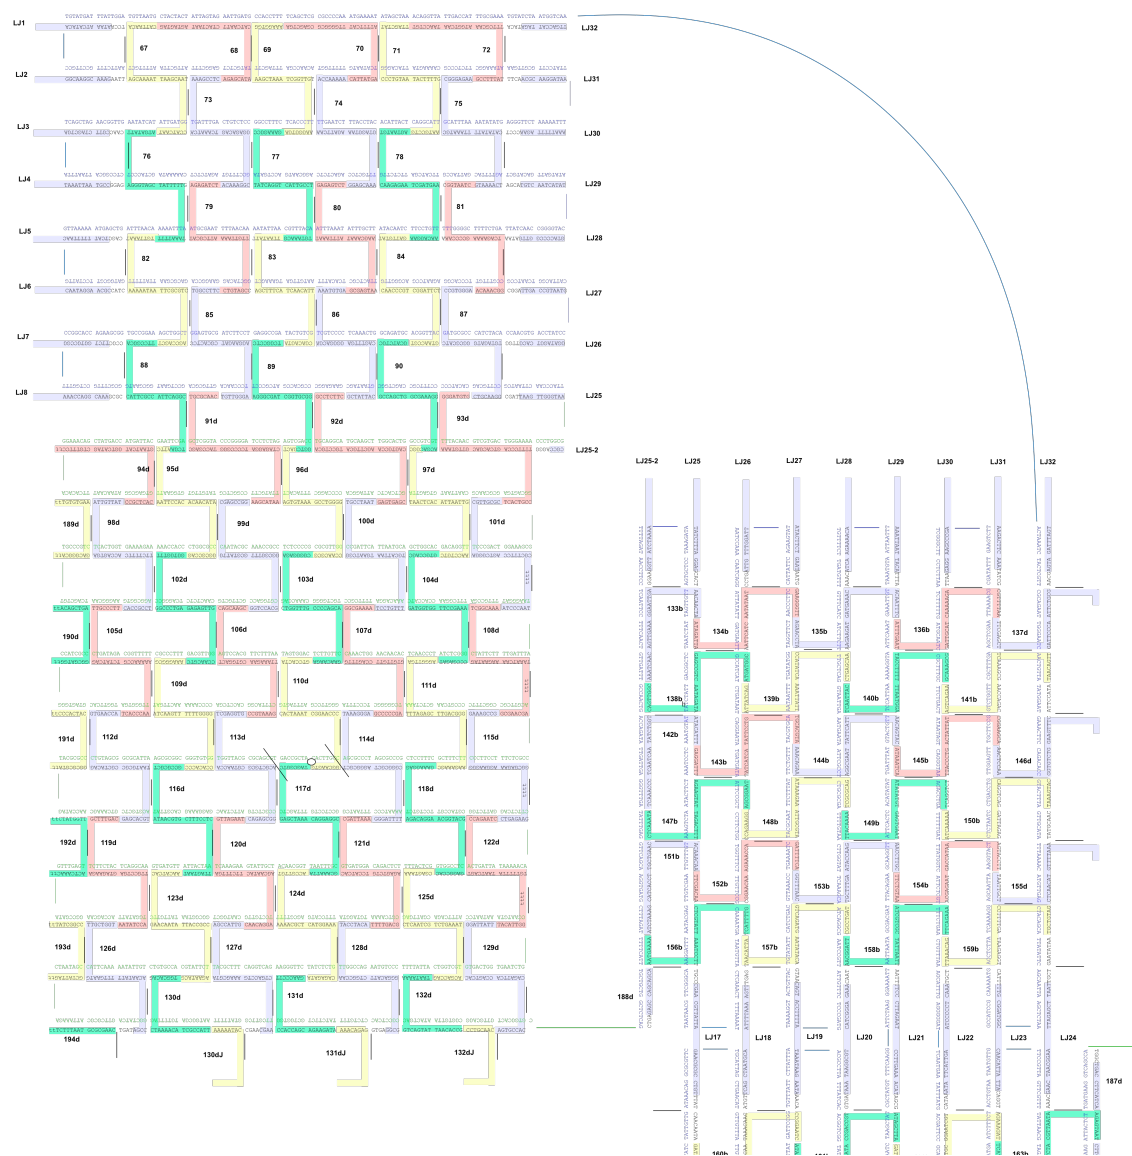

**Supplementary Figure 1.** Detailed sequences of the scaffold and the staples and joints (the upper-half of the motif).

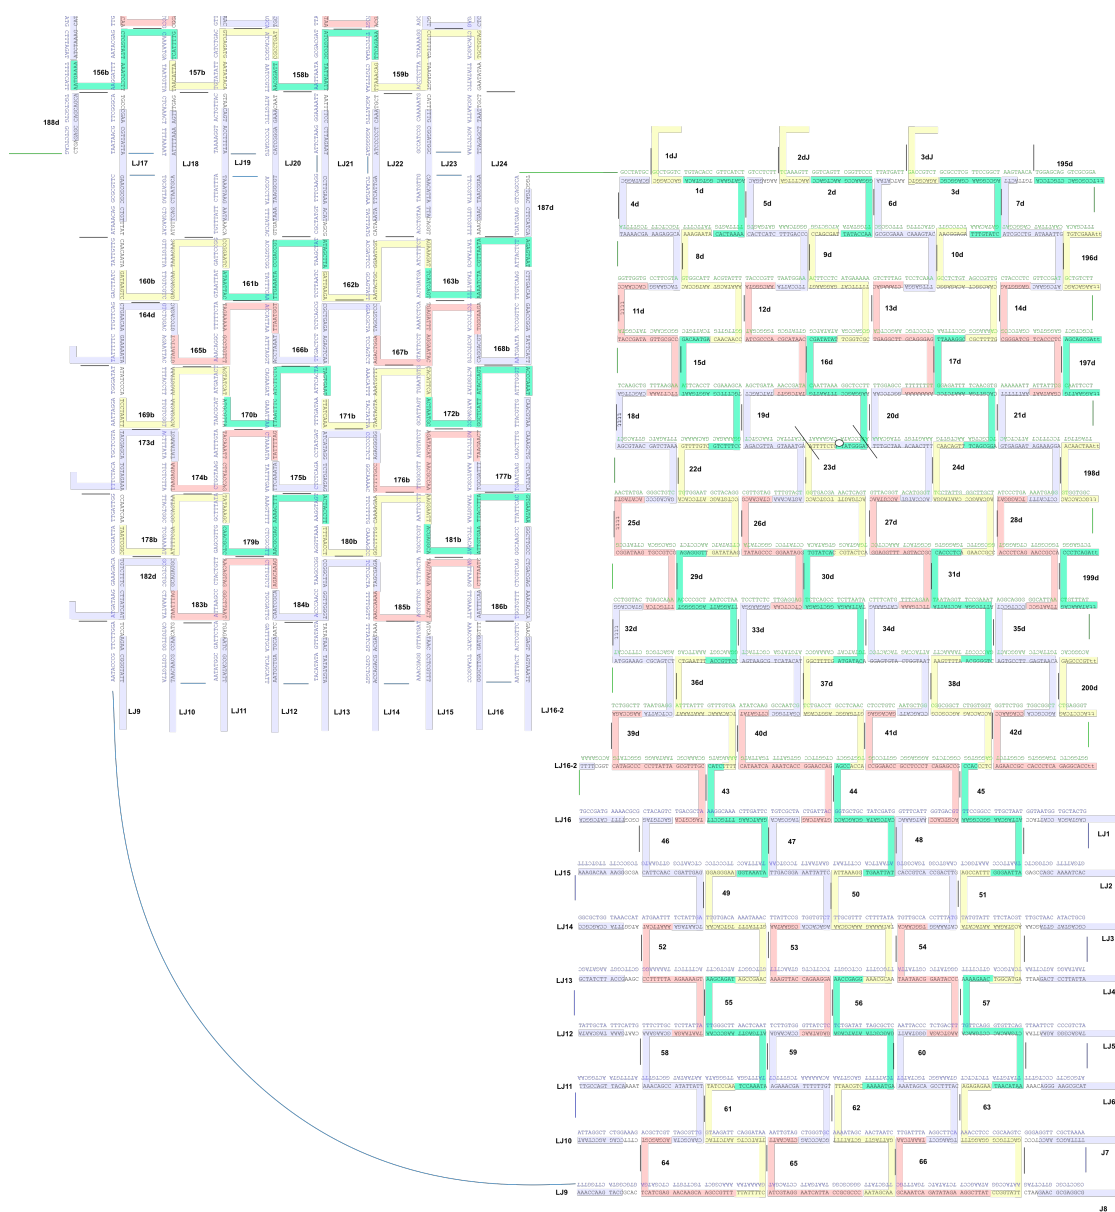

**Supplementary Figure 2.** Detailed sequences of the scaffold and the staples and joints (the lower-half of the motif).

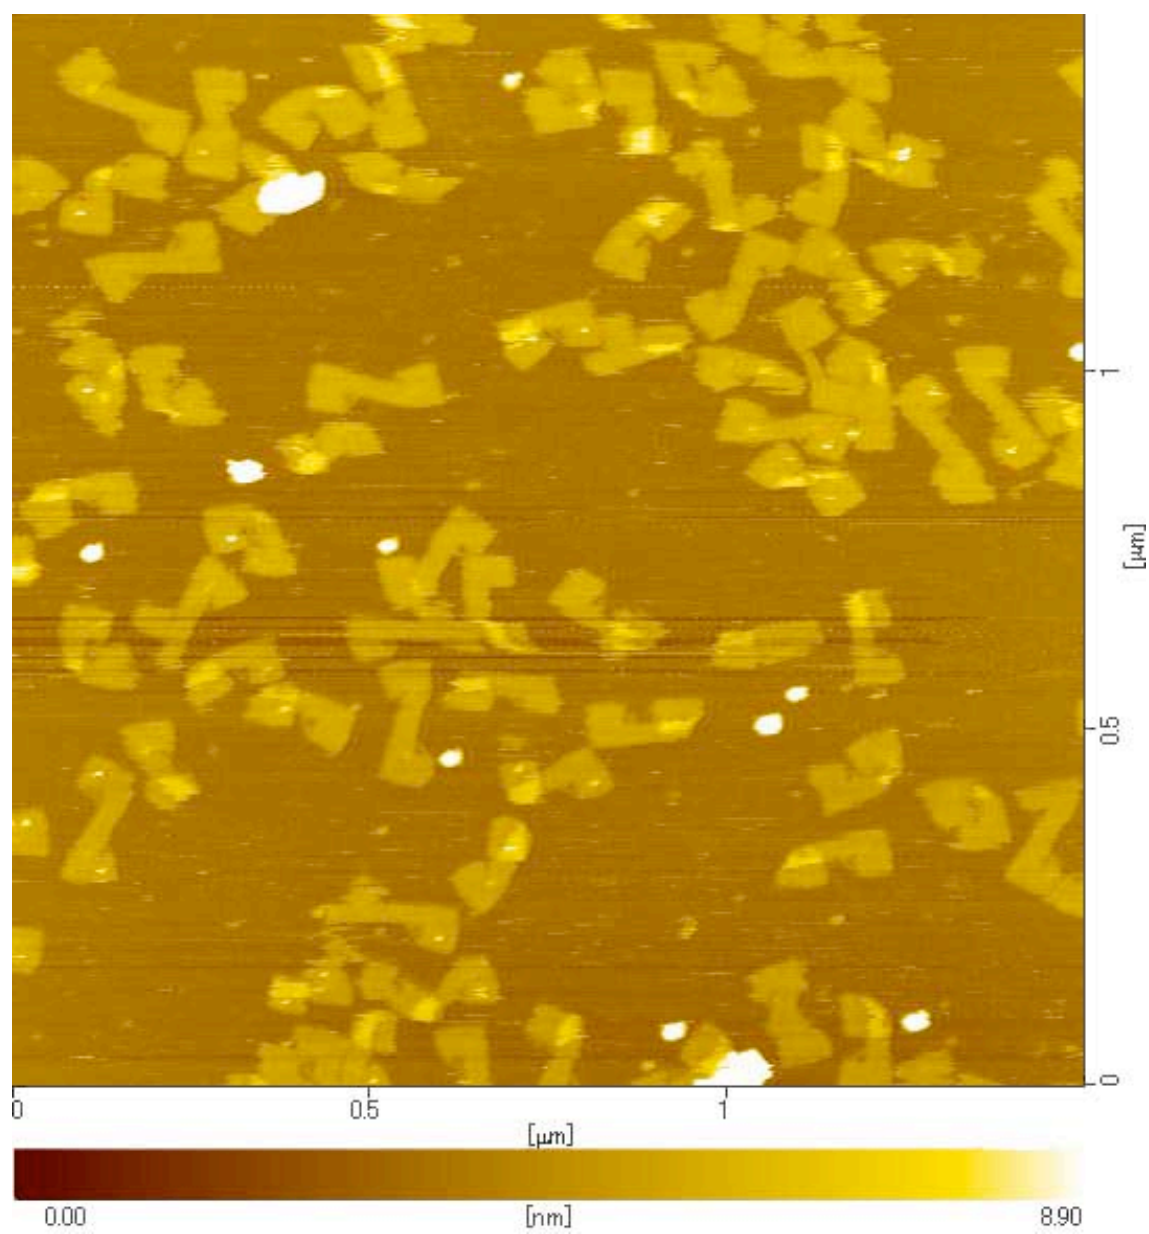

**Supplementary Figure 3.** Magnified AFM image of Fig.2(a).

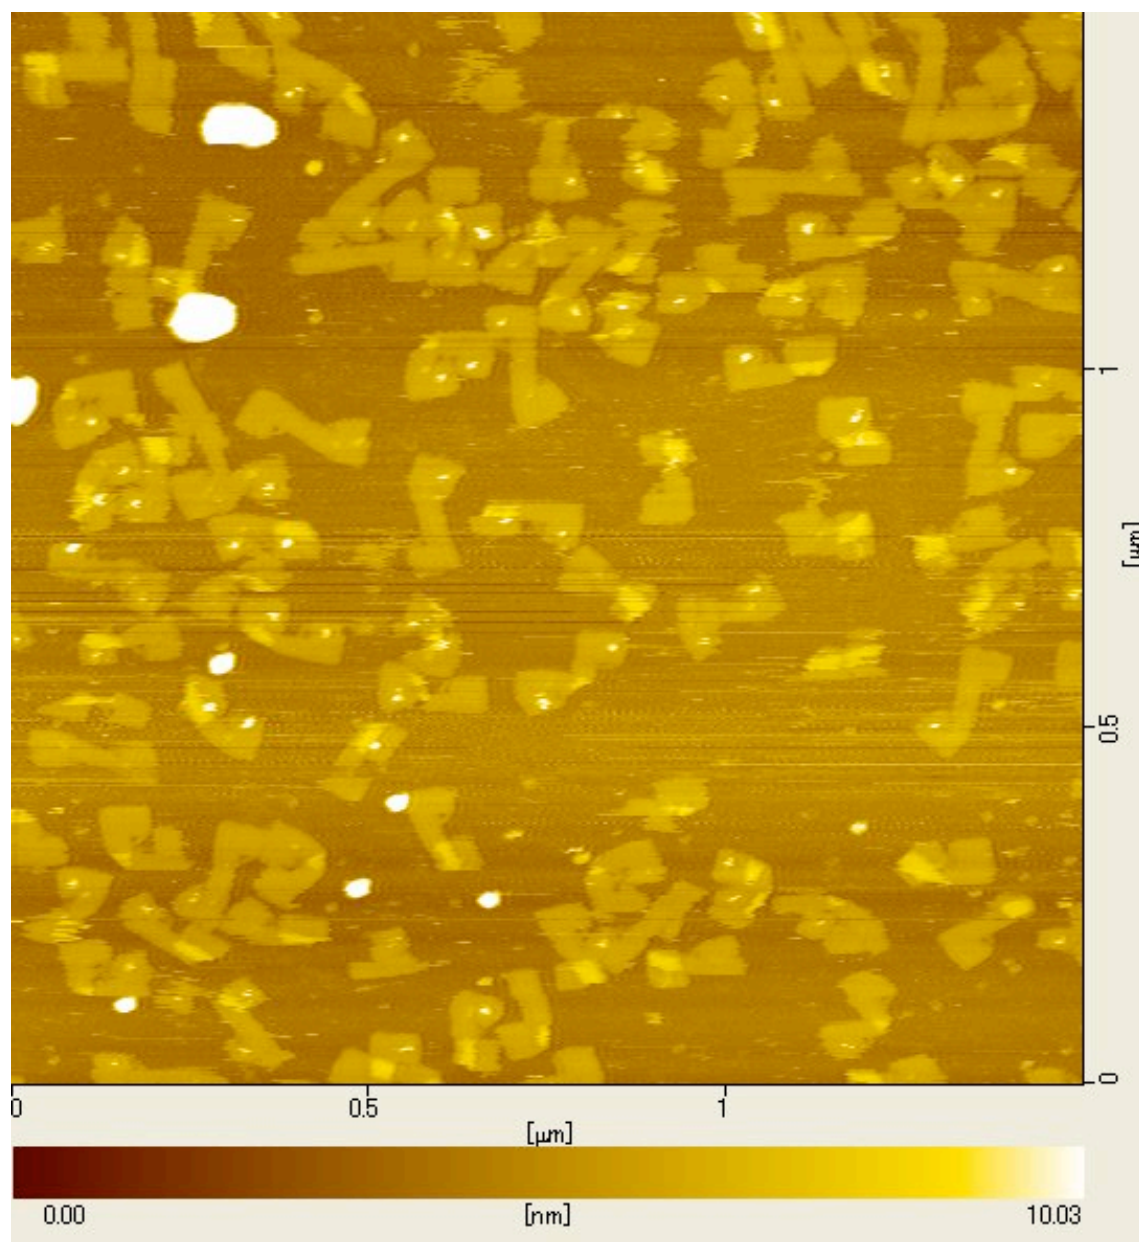

**Supplementary Figure 4.** Another AFM image of the open motifs.

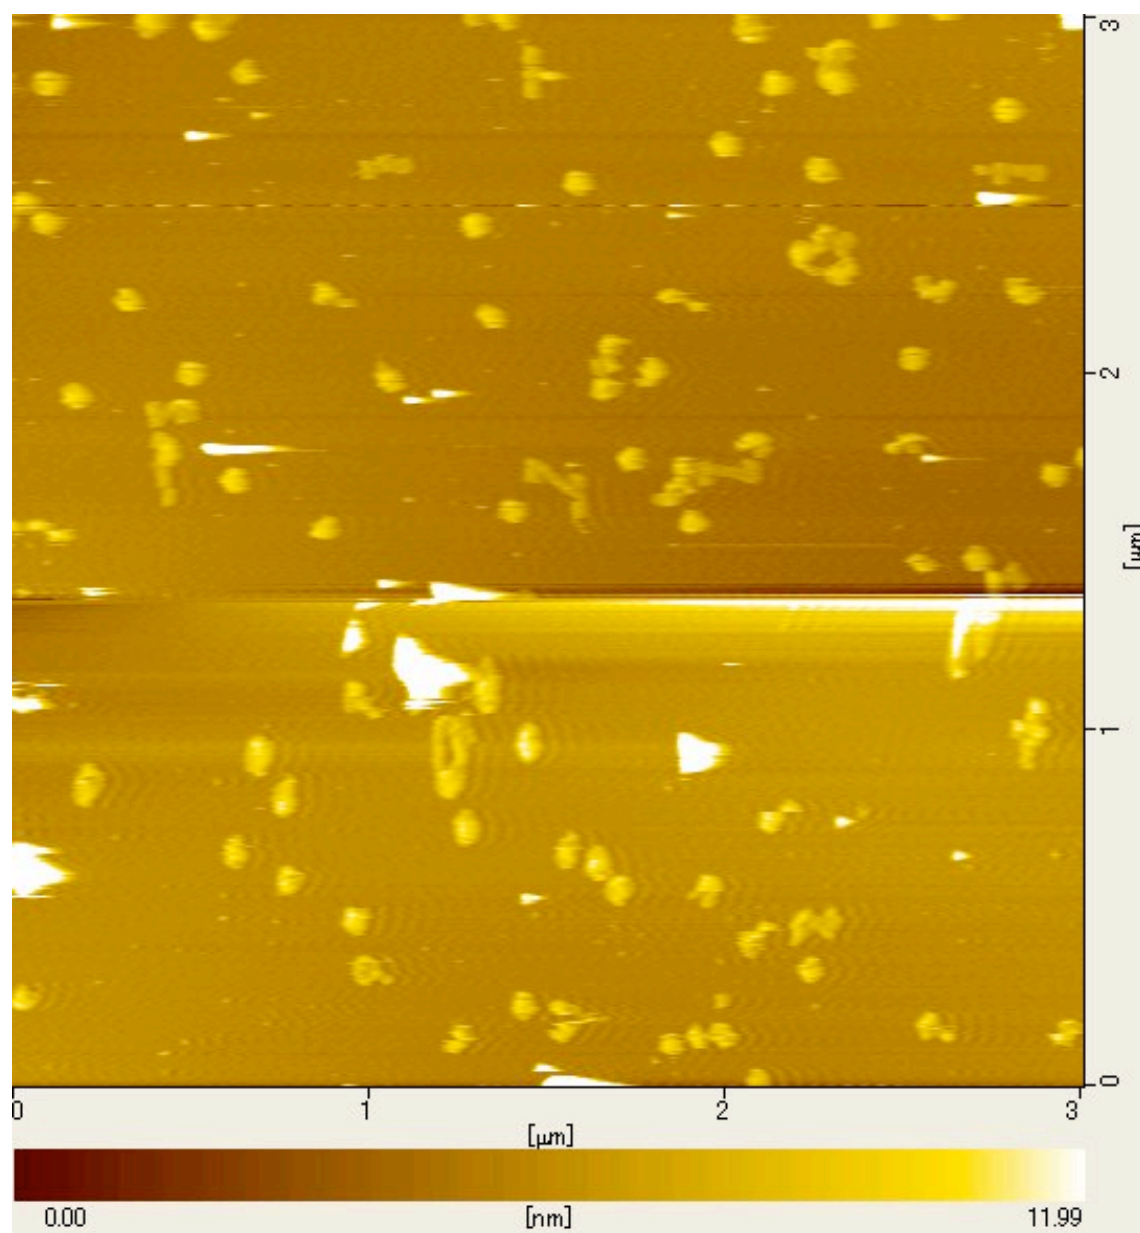

**Supplementary Figure 5.** Wider view of Fig 2(b).



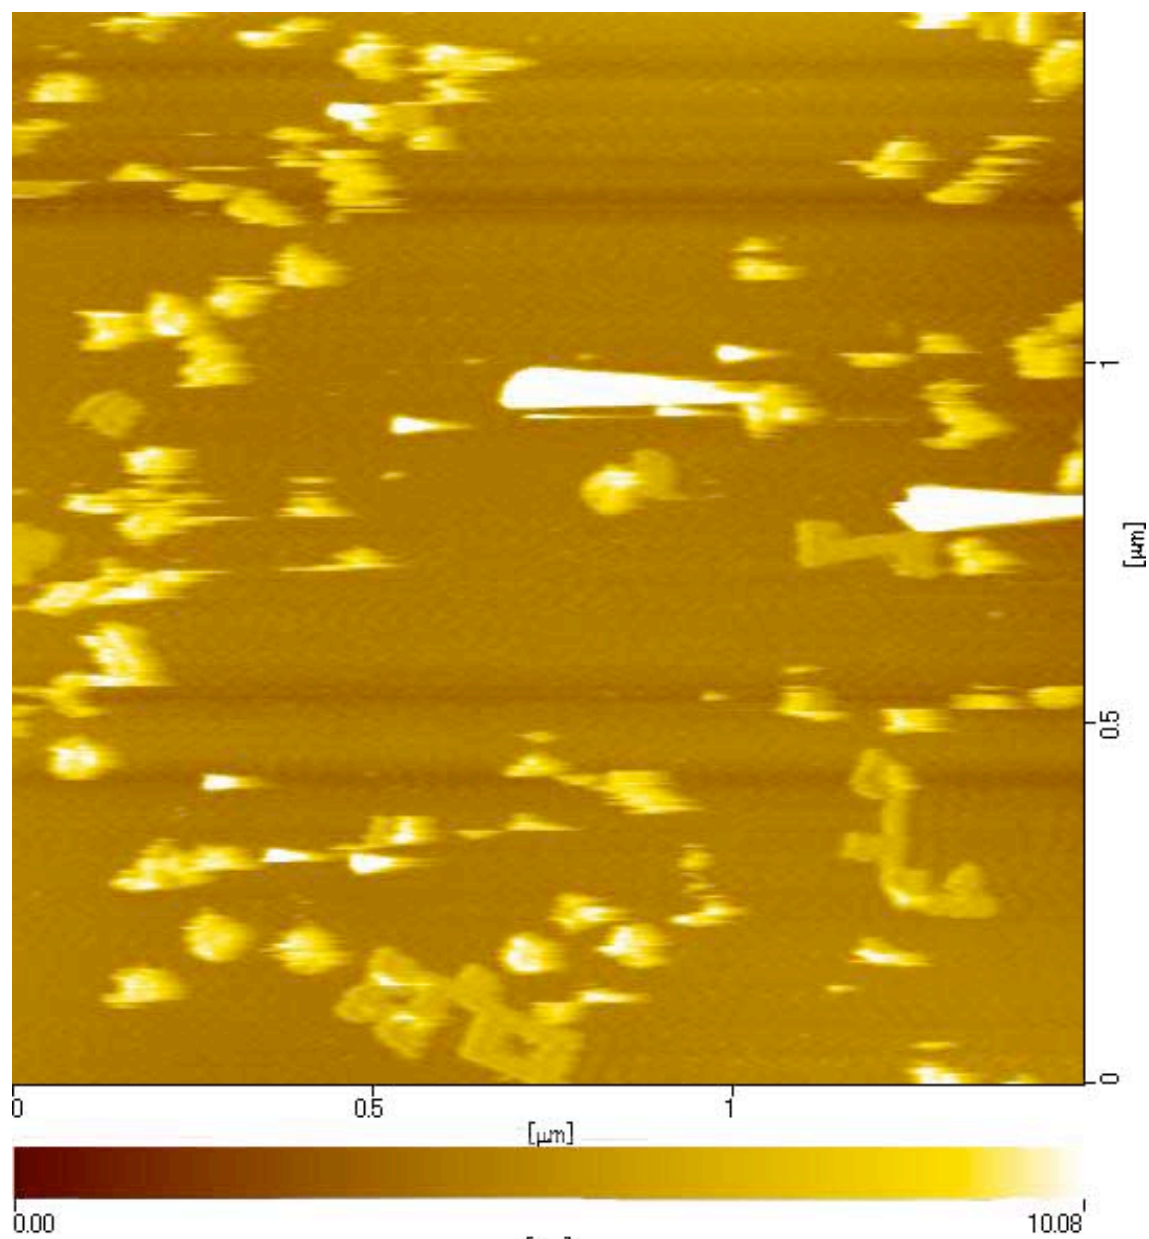

**Supplementary Figure 6.** Another AFM image of the closed motifs.
